# Supplementary material for: A Multi-Site, International Audit of Malnutrition Risk and Energy and Protein Intakes in Patients Undergoing Treatment for Head Neck and Esophageal Cancer: Results from INFORM
Source: MDPI journal article supplement (doi:10.3390/nu14245272), 2022-12-10
Supplement: s1 [file s1]

**Supplementary Table S1:** Number of patients with complete PG-SGA SF, route of nutrition, and energy and protein intake data per audit period.

| Type of Cancer | Audit Period | Patients with PG-SGA SF recorded | Patients with nutrition route recorded | Patients with energy and protein intakes recorded | Patients with PG-SGA SF and energy and protein intakes recorded |
|----------------|--------------|----------------------------------|----------------------------------------|---------------------------------------------------|-----------------------------------------------------------------|
| HN             | Any*         | 119                              | 103                                    | 81                                                | 78                                                              |
|                | Baseline     | 116                              | 97                                     | 70                                                | 68                                                              |
|                | Month 2      | 104                              | 84                                     | 64                                                | 57                                                              |
|                | Month 4      | 105                              | 57                                     | 41                                                | 38                                                              |
|                | Month 6      | 90                               | 27                                     | 18                                                | 16                                                              |
|                |              |                                  |                                        |                                                   |                                                                 |
| ESO            | Any*         | 49                               | 50                                     | 50                                                | 49                                                              |
|                | Baseline     | 44                               | 50                                     | 48                                                | 42                                                              |
|                | Month 2      | 38                               | 37                                     | 36                                                | 28                                                              |
|                | Month 4      | 38                               | 39                                     | 40                                                | 32                                                              |
|                | Month 6      | 36                               | 21                                     | 22                                                | 15                                                              |

Abbreviations: ESO, esophageal cancer; HN, head and neck cancer; PG-SGA SF, patient generated-subjective global assessment short form
